# Supplementary material for: GWAS for Interleukin-1β levels in gingival crevicular fluid identifies IL37 variants in periodontal inflammation
Source: PubMed Central journal article supplement (PMC6134146; doi:10.1038/s41467-018-05940-9), 2018-09-11
Supplement: 41467_2018_5940_MOESM1_ESM.pdf [file 41467_2018_5940_MOESM1_ESM.pdf]

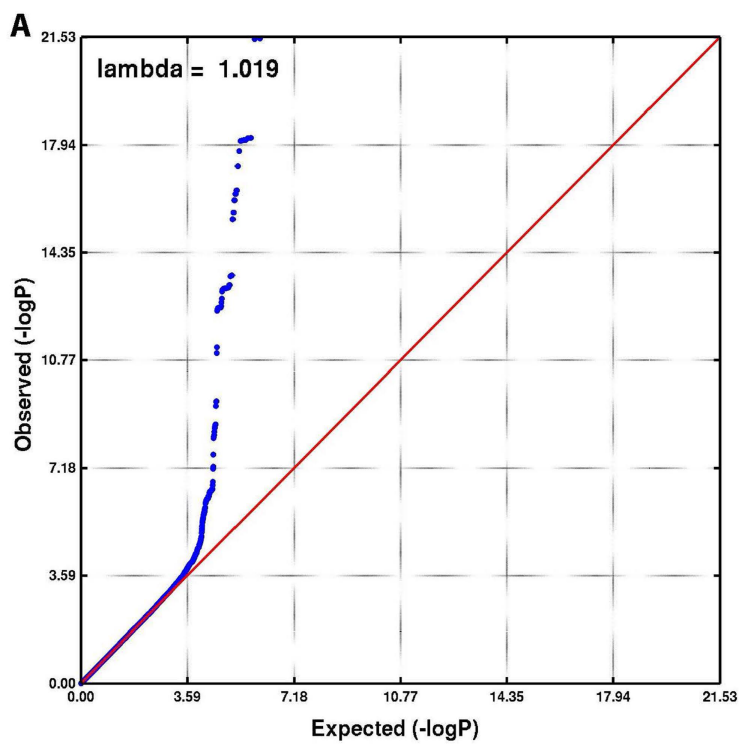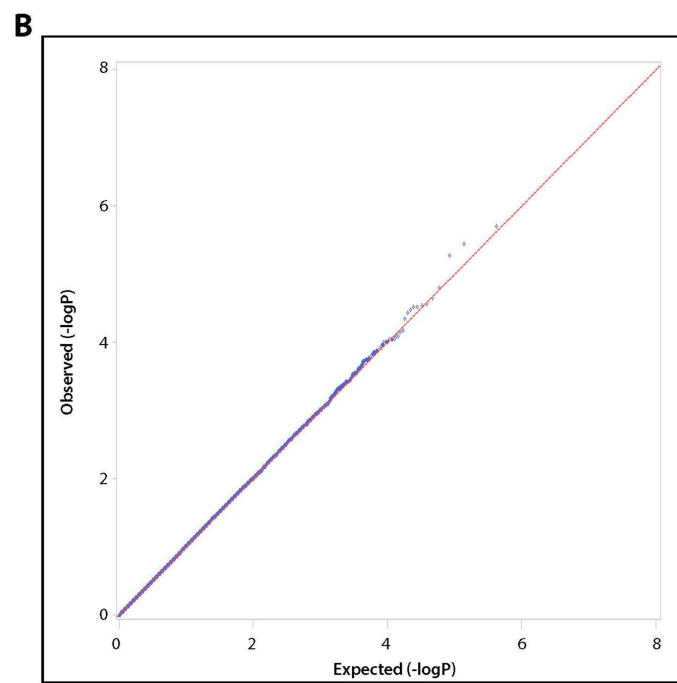

**Supplementary Figure 1: QQ Plot for Top Quartile of GCF IL-1 $\beta$ .**

There was virtually no genomic inflation without significant confounding of the variance of GCF IL-1 $\beta$  level.

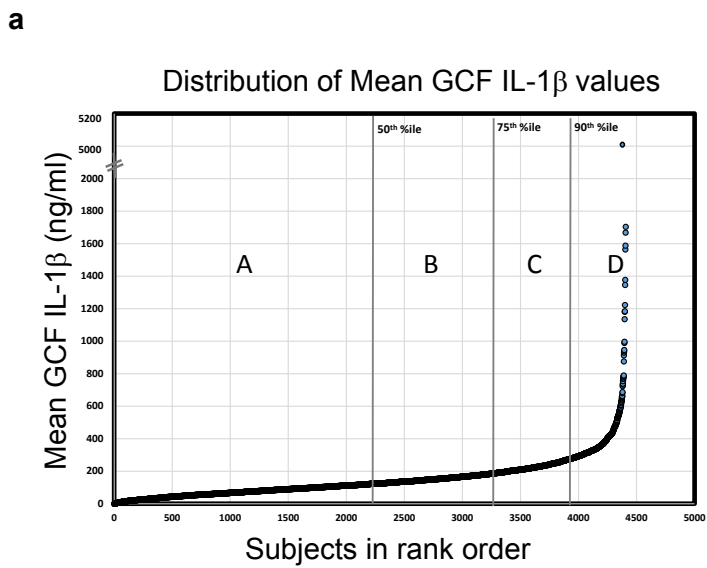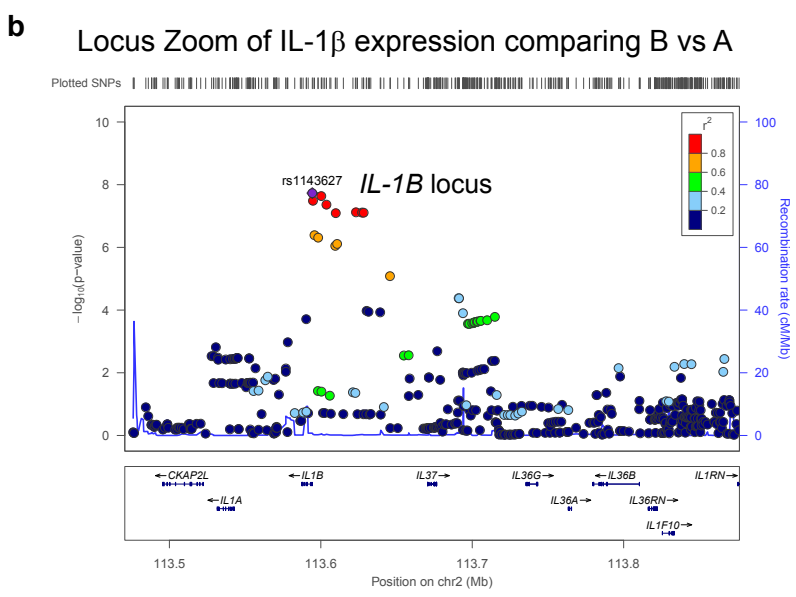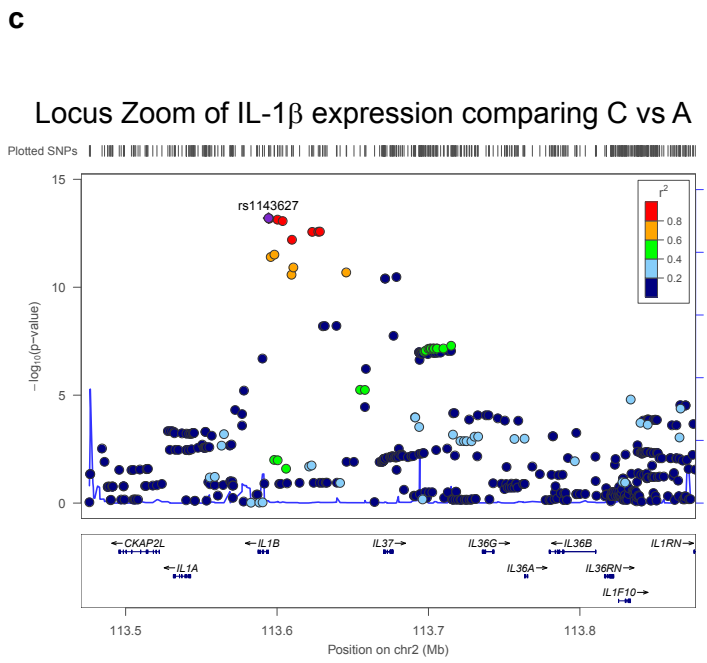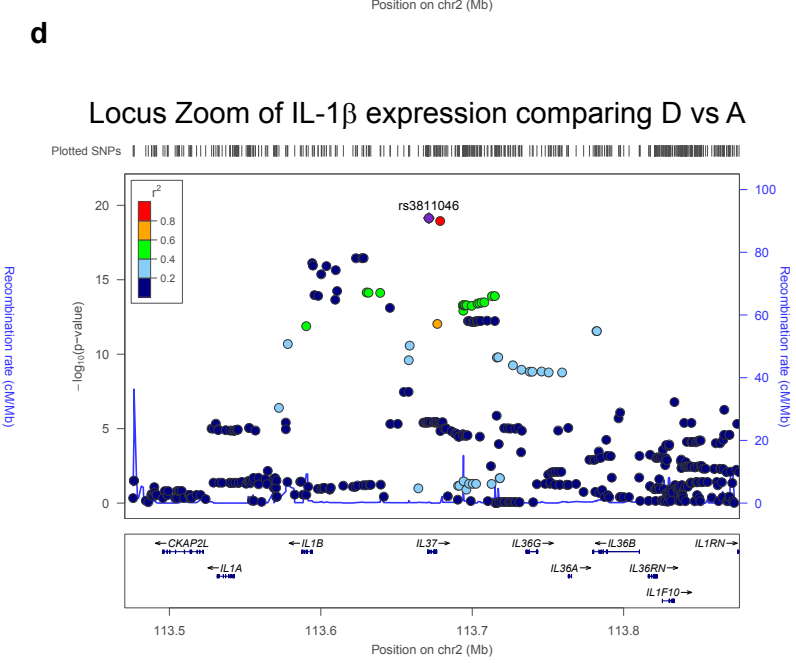

Beta (p-value) for each GWAS run

|           | BvsA             | CvsA             | DvsA             |
|-----------|------------------|------------------|------------------|
| rs16944   | -0.33 (3.24e-08) | -0.56 (6.54e-14) | -0.76 (1.09e-16) |
| rs3811046 | 0.15 (1.39e-02)  | 0.46 (3.96e-11)  | 0.74 (7.25e-20)  |

**Supplementary Figure 2:** (a): Distribution of GCF IL-1 $\beta$  levels, IL-1 $\beta$  values among subjects and there is a marked inflection beginning near the 75th percentile. (b): LocusZoom comparing people within the 50-75th percentiles vs 0-50th percentiles, (c): LocusZoom comparing people within the 75-90th percentiles vs 0-50th percentiles. (d): LocusZoom comparing people within the 90-100th percentiles vs 0-50th percentiles.

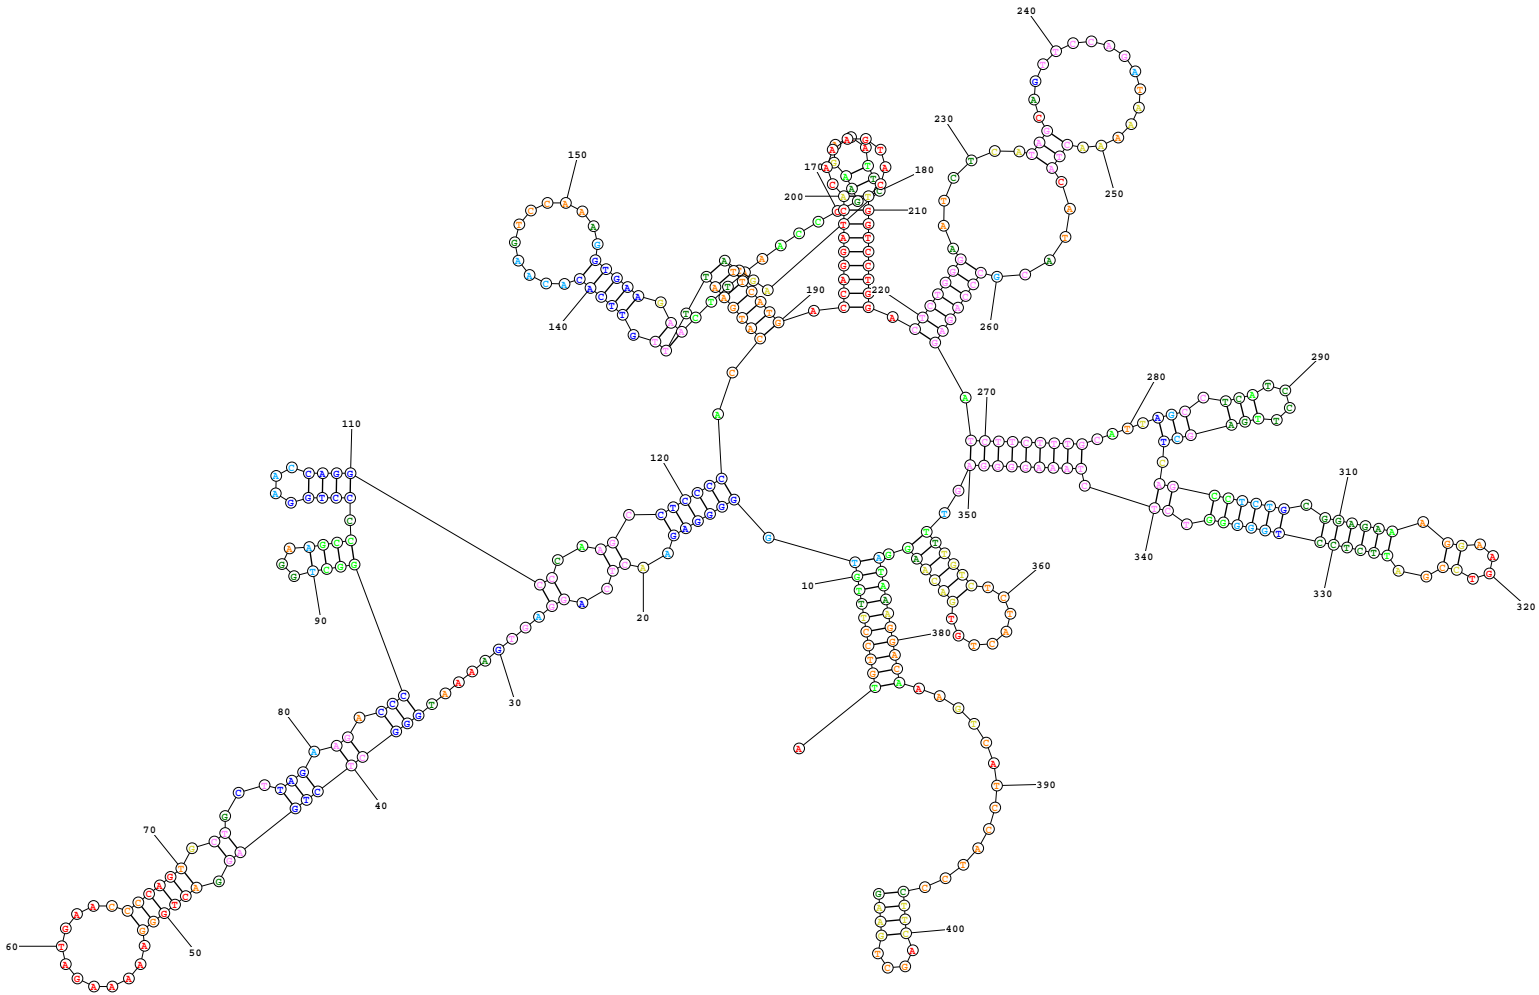

**Supplementary Figure 3:** mRNA structure prediction of IL-37bWT.

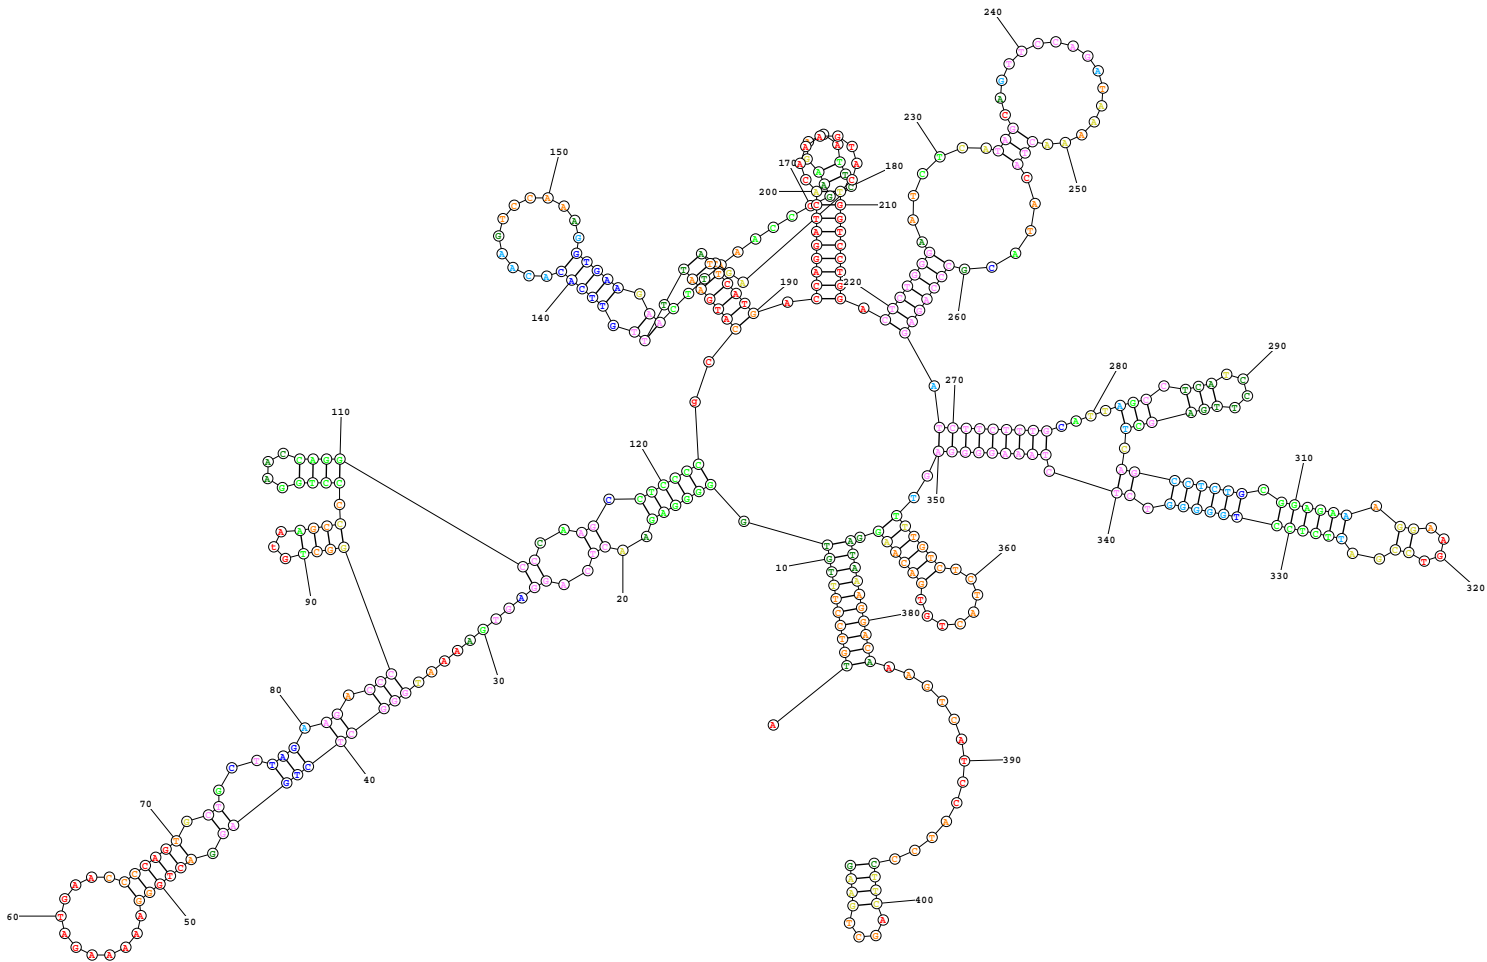

**Supplementary Figure 3: mRNA structure prediction of IL-37bV1.**

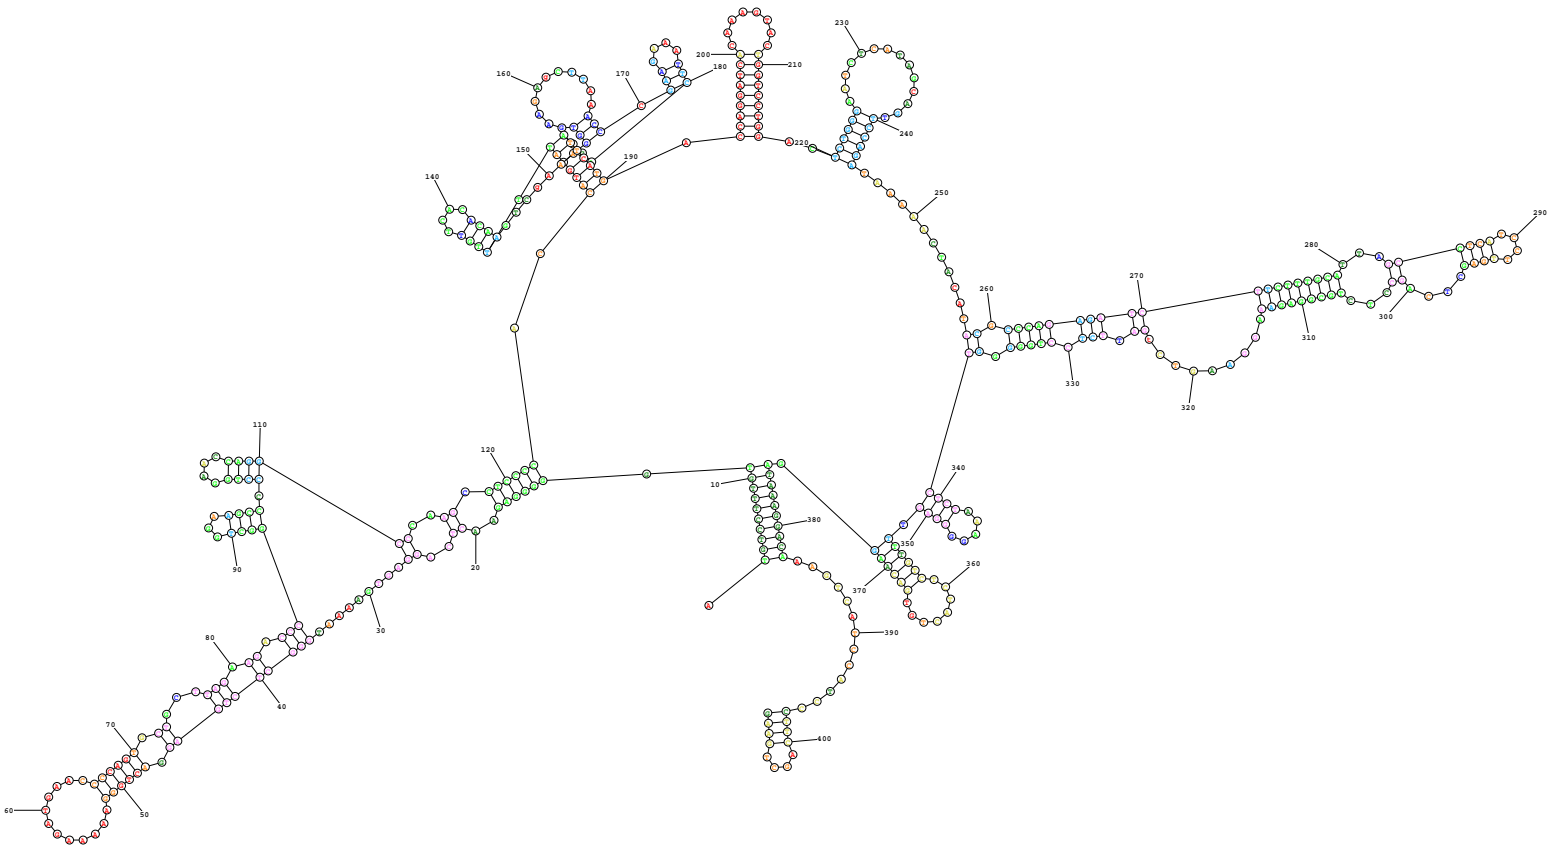

**Supplementary Figure 3: mRNA structure prediction of IL-37bV2.**

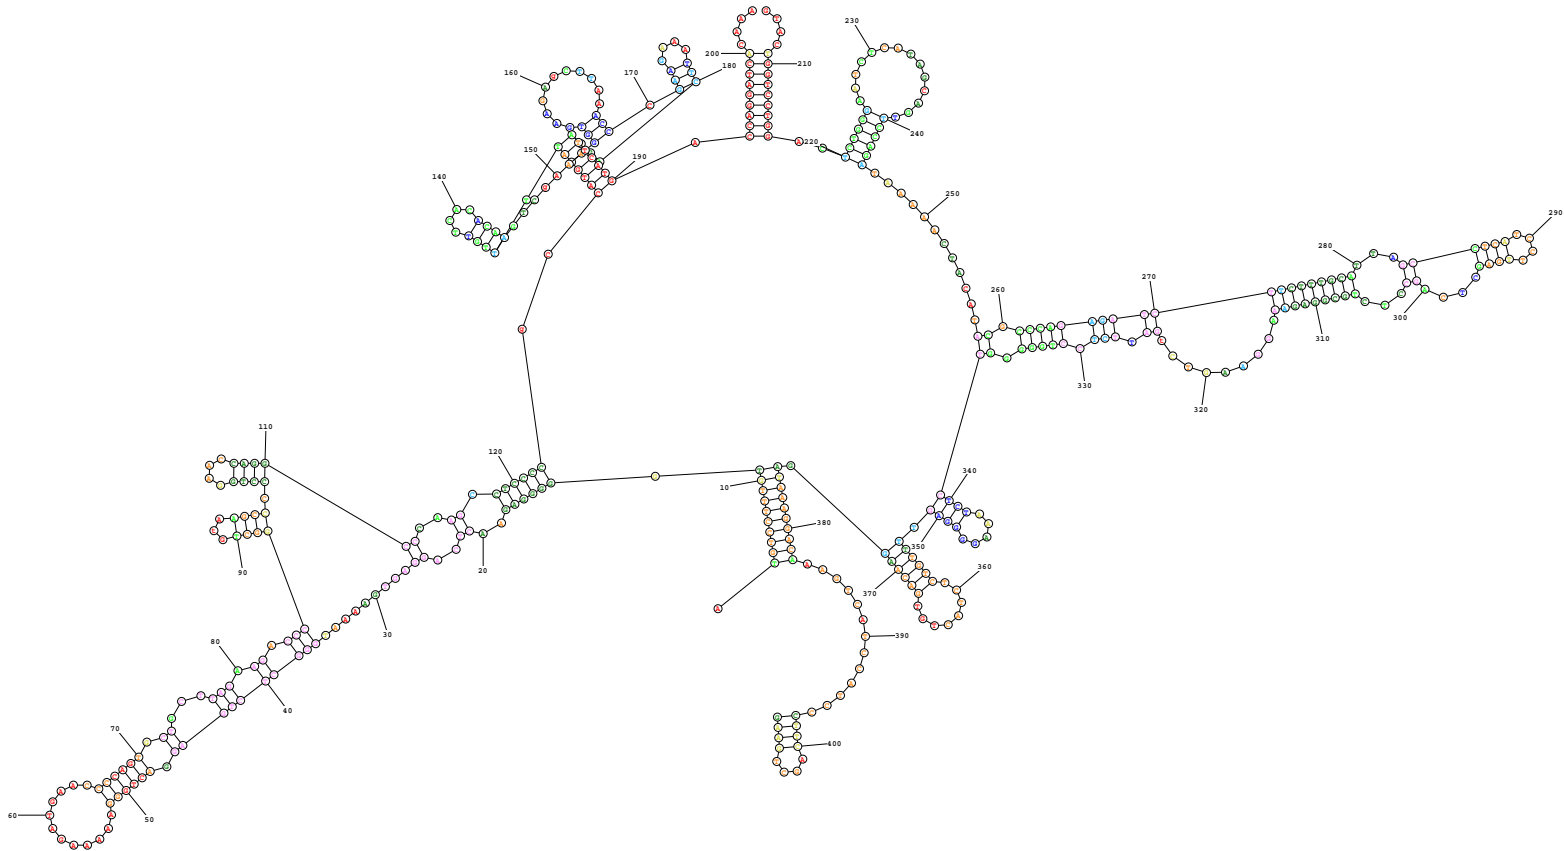

**Supplementary Figure 3: mRNA structure prediction of IL-37bV1V2.**

a Plasma cells

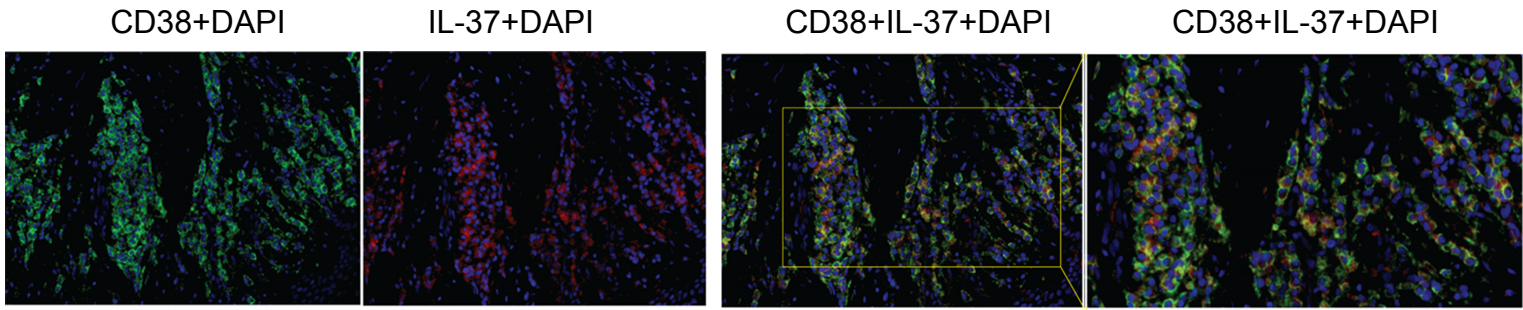

b Epithelial cells

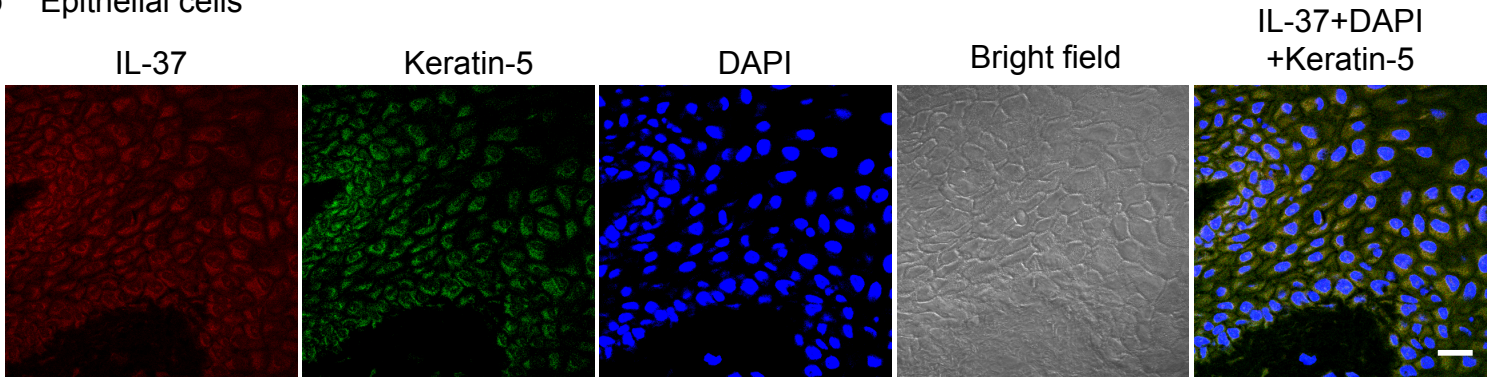

c Dendritic cells

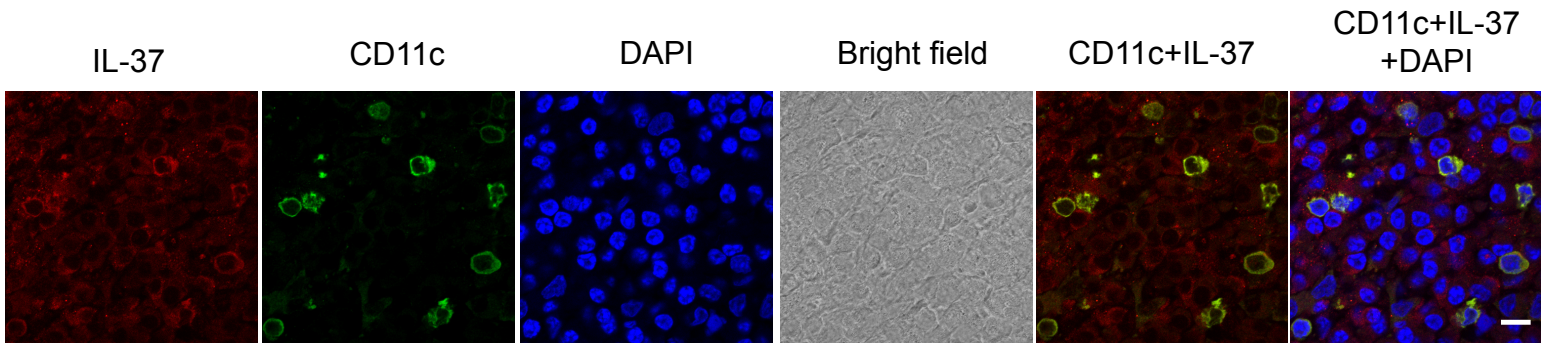

**Supplemental Figure 4:** (a) Co-localization of IL-37 and CD38 in human gingival tissue. (b) Co-localization of IL-37 and Keratin-5 in human gingival tissue. (c) Co-localization of IL-37 and CD11c in human gingival tissue. Scale bar is 10um.

Lineweaver Burk plot for recombinant  
WT & V1 pre IL-37 cleaved by recombinant caspase-1

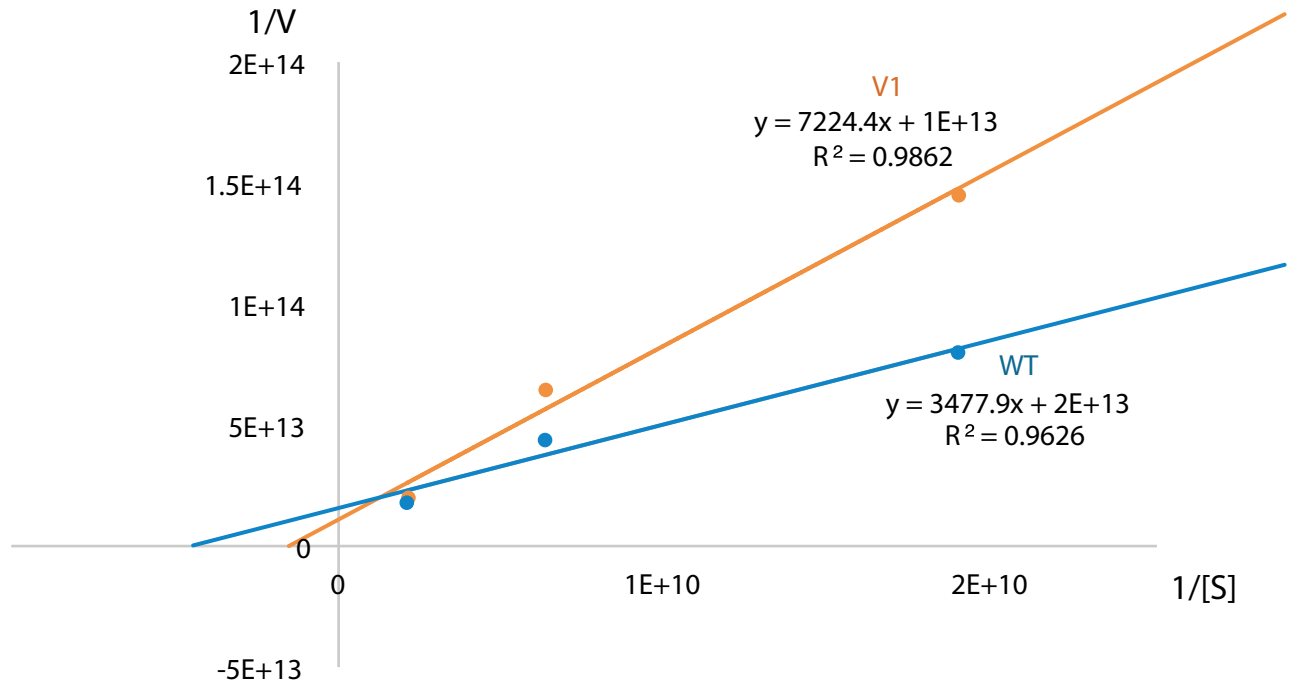

**Supplementary Figure 5:** Lineweaver-Burk plot to measure the initial velocities at different substrate concentrations computed using rHIL-37WT as compared to rHIL-37V1.



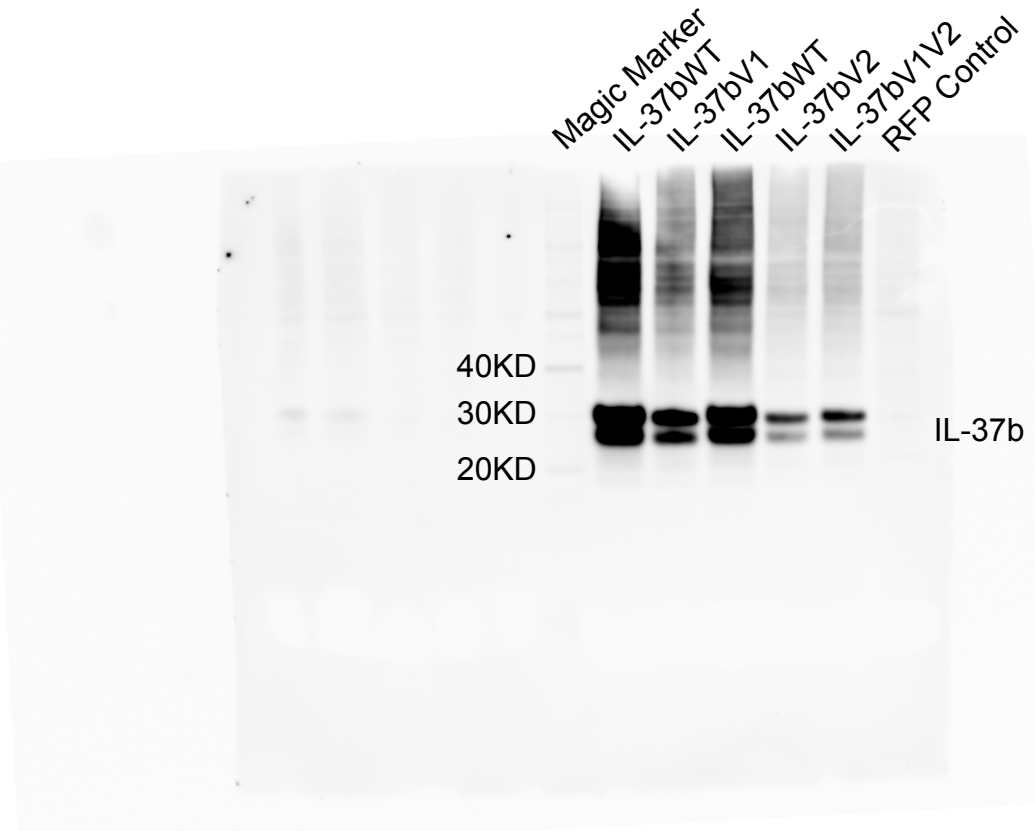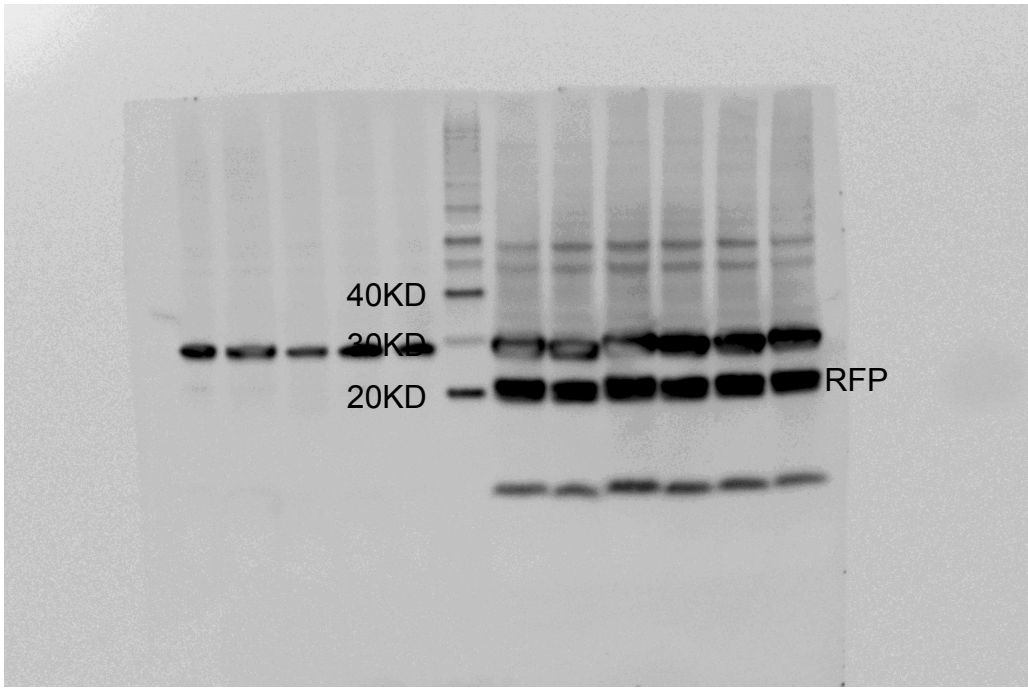

Supplementary Figure 6: The uncropped gel blot for Figure 7b.

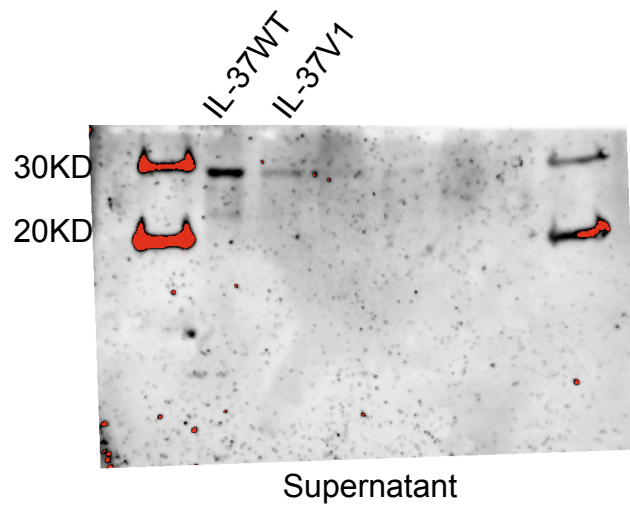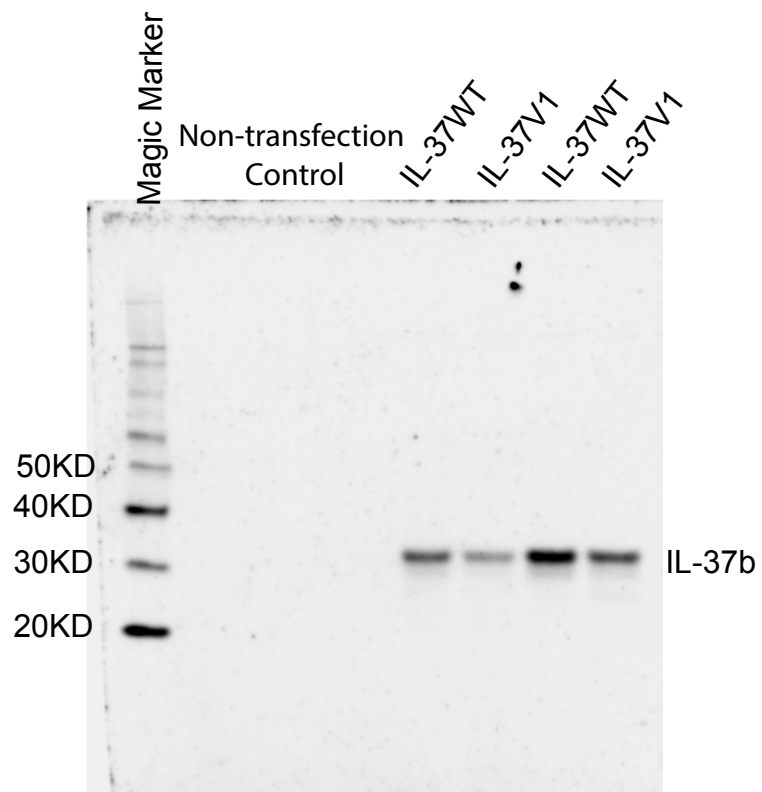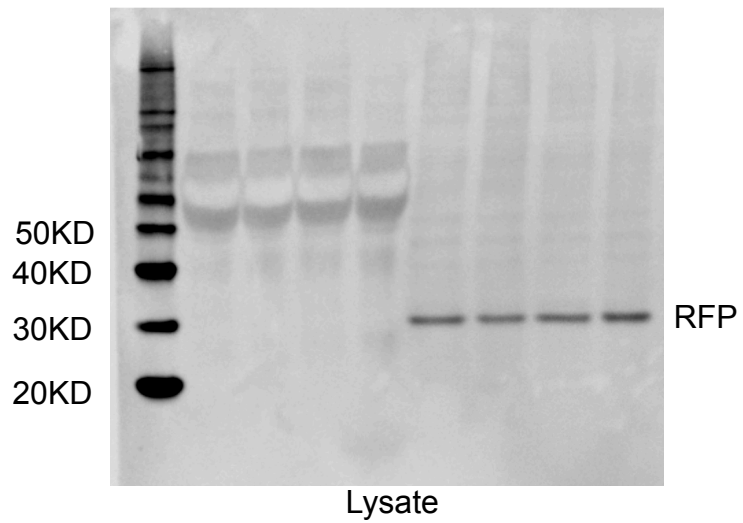

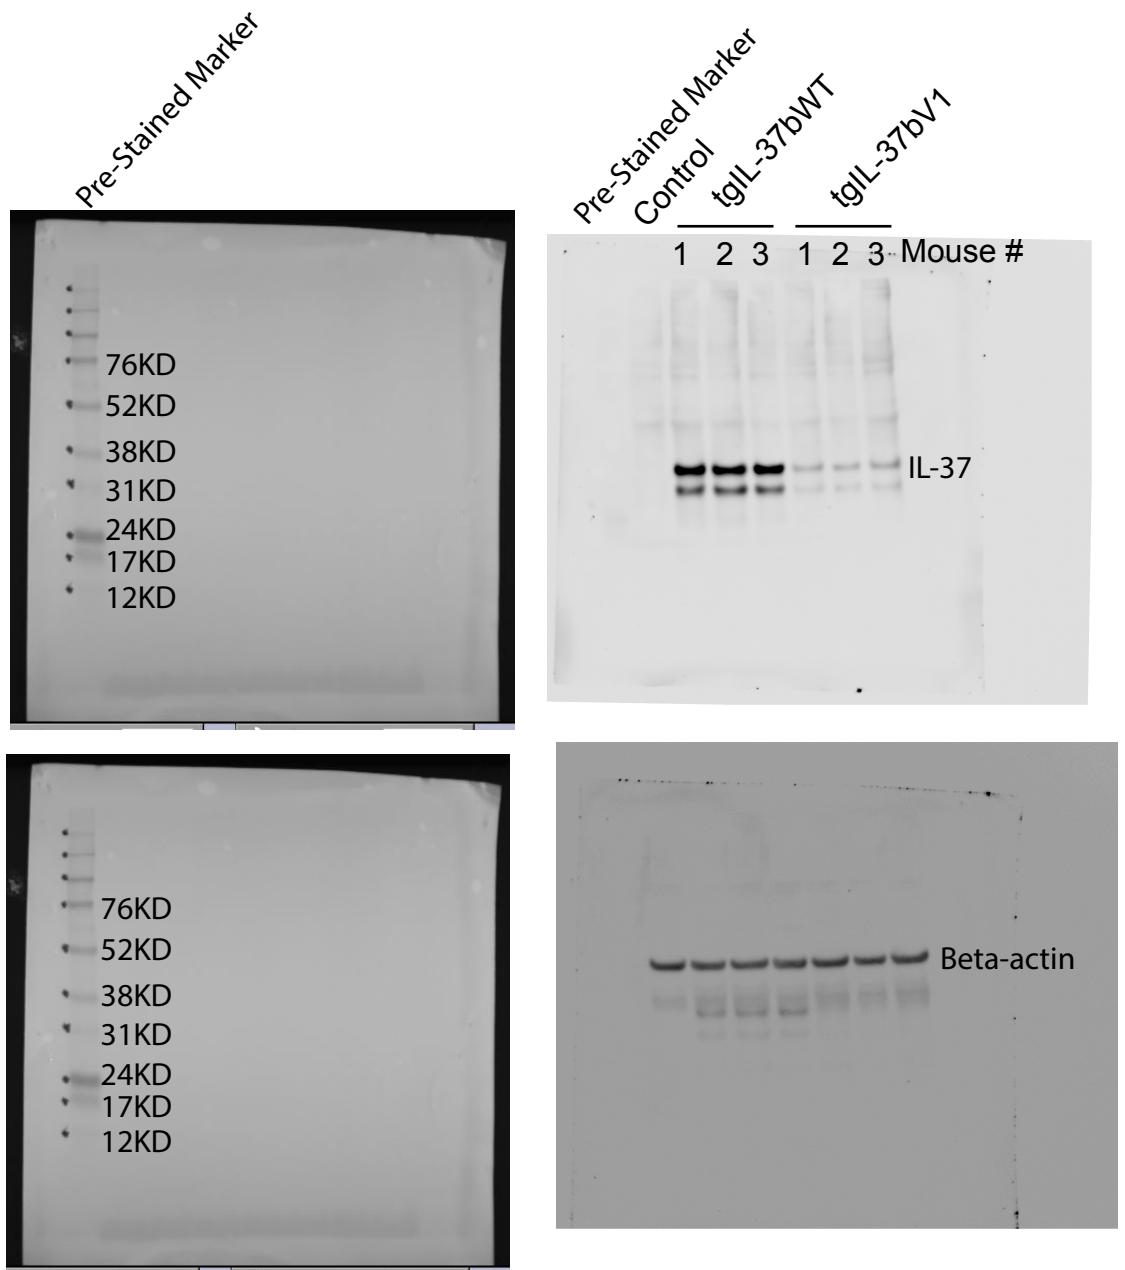

Supplementary Figure 8: The uncropped gel blot for Figure 8b.

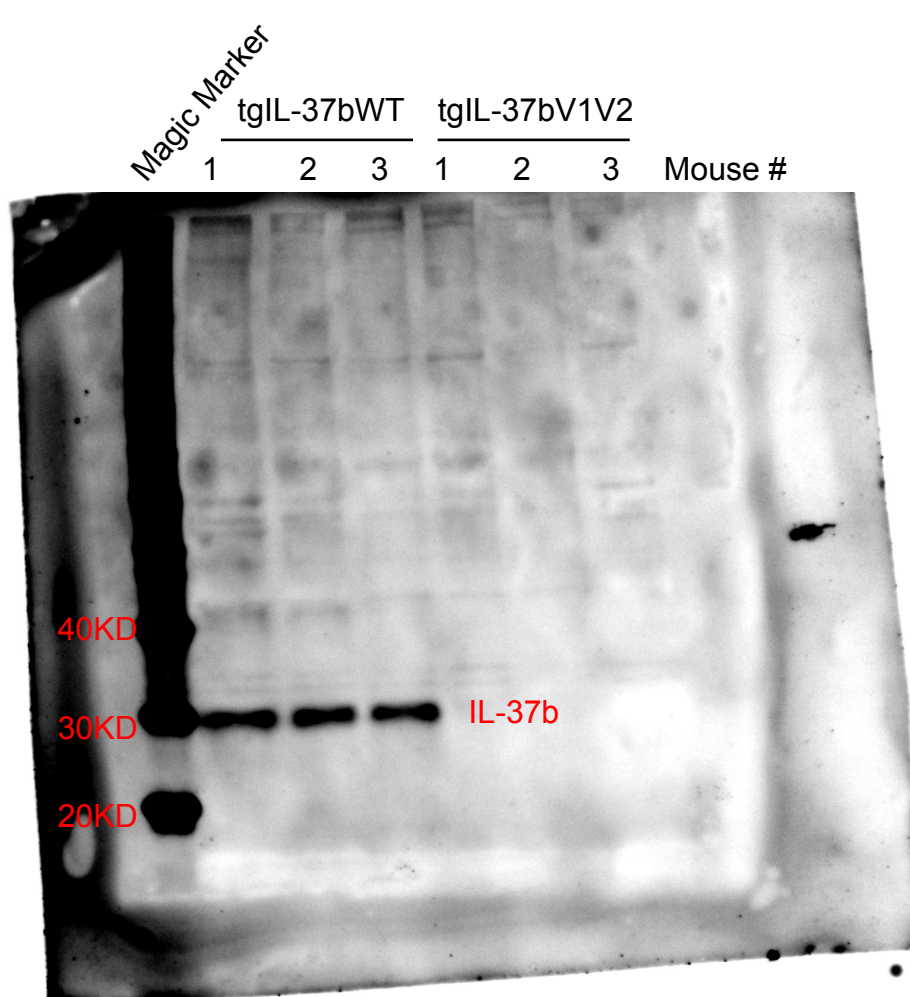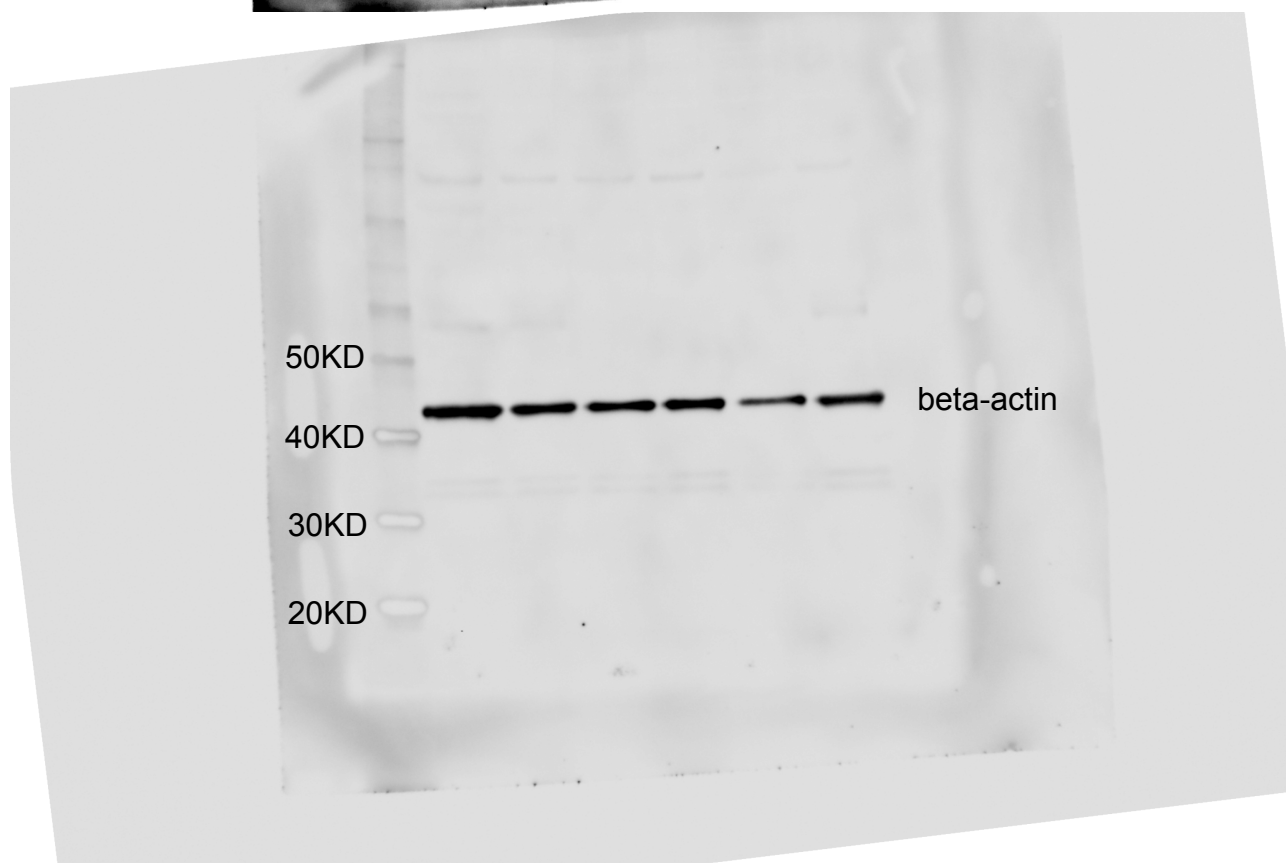

Supplementary Figure 9: The uncropped gel blot for Figure 8d.

**Supplementary Table 1. Characteristics of Dental ARIC population according to GCF IL-1 $\beta$  Levels.**

|                                | Entire sample<br>(n=4,408) | “Low” GCF IL-1 $\beta$<br>(0-75 <sup>th</sup> Percentile)<br>(n=3320) | “High” GCF IL-1 $\beta$<br>(>75 <sup>th</sup> Percentile)<br>(n=1088) | p-value (X <sup>2</sup> test,<br>ANOVA) |
|--------------------------------|----------------------------|-----------------------------------------------------------------------|-----------------------------------------------------------------------|-----------------------------------------|
| Age [years; mean (SD)]         | 62.7 (5.60)                | 62.6 (5.59)                                                           | 62.9 (5.60)                                                           | 0.19                                    |
| Gender                         |                            |                                                                       |                                                                       | 0.11                                    |
| Male                           | 2107 (47.8%)               | 1564 (74.2%)                                                          | 543 (25.8%)                                                           |                                         |
| Female                         | 2301 (52.2%)               | 1756 (76.3%)                                                          | 545 (23.7%)                                                           |                                         |
| Diabetes diagnosis             |                            |                                                                       |                                                                       | 0.0004                                  |
| Diabetic                       | 499 (11.3%)                | 344 (68.9%)                                                           | 155 (31.1%)                                                           |                                         |
| Non-Diabetic                   | 3903 (88.7%)               | 2972 (76.2%)                                                          | 931 (23.9%)                                                           |                                         |
| Carotid Intima-media thickness |                            |                                                                       |                                                                       | 0.002                                   |
| $\geq$ 1mm                     | 718 (26.5%)                | 528 (73.5%)                                                           | 190 (26.5%)                                                           |                                         |
| <1mm                           | 5386 (88.2%)               | 4241 (78.7%)                                                          | 1145 (21.3%)                                                          |                                         |
| Examination Center             |                            |                                                                       |                                                                       | 0.73                                    |
| NC                             | 1306 (29.6%)               | 994 (76.1%)                                                           | 312 (23.9%)                                                           |                                         |
| MN                             | 1855 (42.1%)               | 1392 (75.0%)                                                          | 463 (25.0%)                                                           |                                         |
| MD                             | 1247 (28.3%)               | 934 (74.9%)                                                           | 313 (25.1%)                                                           |                                         |
| Body Mass Index [mean (SD)]    | 28.1 (5.03)                | 28.0 (4.98)                                                           | 28.5 (5.16)                                                           | 0.007                                   |
| Smoking status                 |                            |                                                                       |                                                                       | <0.0001                                 |
| Never Smoker                   | 1997 (46.3%)               | 1542 (77.2%)                                                          | 455 (22.8%)                                                           |                                         |
| Former Smoker, Light           | 962 (22.3%)                | 739 (76.8%)                                                           | 223 (23.2%)                                                           |                                         |
| Former Smoker, Heavy           | 825 (19.1%)                | 620 (75.2%)                                                           | 205 (24.9%)                                                           |                                         |
| Current Smoker, Light          | 77 (1.8%)                  | 50 (64.9%)                                                            | 27 (35.1%)                                                            |                                         |
| Current Smoker, Heavy          | 451 (10.5%)                | 297 (65.9%)                                                           | 154 (34.2%)                                                           |                                         |
| Periodontal Profile Class      |                            |                                                                       |                                                                       | <0.0001 <sup>a</sup>                    |
| PPC Health                     | 1727 (27.8%)               | 1406 (82.4%)                                                          | 321 (18.6%)                                                           | Ref <sup>b</sup>                        |
| PPC Mild Perio.                | 956 (15.4%)                | 709 (74.2%)                                                           | 247 (25.8%)                                                           | <0.0001                                 |
| PPC High Gingival Index        | 644 (10.4%)                | 563 (87.4%)                                                           | 81 (12.6%)                                                            | 0.0006                                  |
| PPC Moderate Perio.            | 698 (11.3%)                | 548 (78.5%)                                                           | 150 (21.5%)                                                           | 0.10                                    |
| PPC Tooth loss                 | 918 (14.8%)                | 655 (72.4%)                                                           | 263 (28.7%)                                                           | <0.0001                                 |
| PPC Severe Tooth Loss          | 824 (13.3%)                | 651 (79.0%)                                                           | 173 (21.0%)                                                           | 0.15                                    |
| PPC Severe Perio.              | 440 (7.1%)                 | 323 (73.4%)                                                           | 117 (26.6%)                                                           | 0.0002                                  |
| CP diagnosis (CDC/AAP)         |                            |                                                                       |                                                                       | <0.0001 <sup>a</sup>                    |
| Health                         | 512 (11.8%)                | 403 (78.7%)                                                           | 109 (21.3%)                                                           | Ref <sup>b</sup>                        |
| Mild                           | 1261 (20.0%)               | 972 (77.1%)                                                           | 289 (22.9%)                                                           | 0.95                                    |
| Moderate                       | 174 (41.9%)                | 1394 (76.6%)                                                          | 426 (23.4%)                                                           | 0.36                                    |
| Severe                         | 753 (17.3%)                | 509 (67.6%)                                                           | 244 (32.4%)                                                           | <0.00001                                |
| BGI periodontal diagnosis      |                            |                                                                       |                                                                       | <0.0001 <sup>a</sup>                    |
| BGI Health                     | 536 (12.3%)                | 442 (82.5%)                                                           | 94 (17.5%)                                                            | Ref <sup>b</sup>                        |
| G1                             | 585 (13.5%)                | 428 (73.2%)                                                           | 157 (26.8%)                                                           | <0.0001                                 |
| P1                             | 899 (20.7%)                | 722 (80.3%)                                                           | 177 (19.7%)                                                           | 0.01                                    |
| P2                             | 1866 (42.9%)               | 1403 (75.2%)                                                          | 463 (24.8%)                                                           | <0.0001                                 |
| P3                             | 461 (10.6%)                | 284 (61.6%)                                                           | 177 (38.4%)                                                           | <0.0001                                 |

<sup>a</sup> Overall P value “Chunk test”    <sup>b</sup> Pairwise comparisons using Health as referant.

BGI: Biofilm-gingival interface    CP: Chronic Periodontitis

High IL-1 $\beta$  was also associated with more severe periodontal disease, using 3 different taxonomies: the PPC 7-level definition, the 4-level CDC/AAP definition and the BGI classification.

**Supplementary Table 2. Stepwise Linear Models for Log Mean stratified on High and low GCF-IL1 $\beta$ .**

| <b>Step</b>                 | <b>SNP Entered</b> | <b>Gene</b>  | <b>Partial R-Square</b> | <b>Model R-Square</b> | <b>Pr &gt; F</b> |
|-----------------------------|--------------------|--------------|-------------------------|-----------------------|------------------|
| High GCF-IL1 $\beta$ Step1  | rs3811046          | <i>IL37</i>  | 0.0098                  | 0.047                 | 0.0015           |
| High GCF-IL1 $\beta$ Step2  | rs3811047          | <i>IL37</i>  | 0.0075                  | 0.0545                | 0.0051           |
| Lower GCF-IL1 $\beta$ Step1 | rs1143627          | <i>IL1B</i>  | 0.0072                  | 0.0135                | <.0001           |
| Lower GCF-IL1 $\beta$ Step2 | rs16944            | <i>IL1B</i>  | 0.0028                  | 0.0163                | 0.0029           |
| Lower GCF-IL1 $\beta$ Step3 | rs13027999         | <i>IL38</i>  | 0.0016                  | 0.0179                | 0.0246           |
| Lower GCF-IL1 $\beta$ Step4 | rs13426809         | <i>IL36G</i> | 0.0012                  | 0.0192                | 0.0472           |

High GCF-IL1 $\beta$ : n=1027, upper quartile

Low GCF-IL1 $\beta$ : n=3151, lower three quartiles

For this analysis, we included all SNPs with p values less than  $5 \times 10^{-6}$  in the models and adjusted for gender, age and ancestry (first 10 principal components).

**Supplementary Table 3. Adjusted\* Relative risk (and 95% confidence intervals) between rs3811046 genotype and prospectively assessed (incident) 10-year tooth loss (≥3 teeth lost) in the Dental ARIC sample (incidence proportion=12.4%, total sample n=2766).**

| 10-year Incident Tooth loss (≥3 teeth) | 1.1 (TT)         | 1.2+2.2 (TG + GG) |
|----------------------------------------|------------------|-------------------|
| Main Effect Model                      |                  |                   |
| rs3811046                              | Ref              | 1.33 (1.09-1.62)  |
| Interaction Model<br>(IL-37V1*PPC)     |                  |                   |
| PPC-A [Health]                         | Ref              | 2.07 (1.18-3.63)  |
| PPC-B [Mild disease]                   | 2.51 (1.40-4.49) | 3.02 (1.73-5.28)  |
| PPC-C [High Gingival Index]            | 3.21 (1.41-7.32) | 3.14 (1.37-7.23)  |
| PPC-D [Tooth Loss]                     | 4.73 (2.71-8.27) | 6.47 (3.82-10.9)  |
| PPC-E [Posterior Disease]              | 3.56 (2.07-6.12) | 3.67 (2.13-6.32)  |
| PPC-F [Severe tooth Loss]              | 2.56 (1.32-4.99) | 3.88 (2.10-7.16)  |
| PPC-G [Severe Disease]                 | 5.27 (2.75-10.1) | 5.75 (3.15-10.5)  |

\*Adjusted for Examination Center, Gender, Age, Diabetes, Smoking (5-levels) and 10 Ancestry PCs. ARIC Cohort includes genotyped, dentate, Caucasian individuals that were available for 10-year follow-up questionnaire. It includes the Dental ARIC cohort subset that received dental examination data at baseline (Visit 4). PPC=Periodontal Profile Class. The change in BIC (Bayesian Information Coefficient) is 7.44 reflecting a “strong” improvement in the model by the addition of the SNP variant status.

**Supplementary Table 4. Logistic regression model\*-predicted probabilities of 10-year tooth loss ( $\geq 3$  teeth) by rs3811046 genotype and chronic periodontal disease status.**

| Chronic Periodontal Disease Status | N    | rs3811046 (IL-37V1) genotype |         |         |
|------------------------------------|------|------------------------------|---------|---------|
|                                    |      | 1.1(TT)                      | 1.2(TG) | 2.2(GG) |
| PPC-A [Health]                     | 1461 | 0.05                         | 0.06    | 0.08    |
| PPC-B [Mild disease]               | 811  | 0.10                         | 0.12    | 0.17    |
| PPC-C [High Gingival Index]        | 158  | 0.13                         | 0.15    | 0.18    |
| PPC-D [Tooth Loss]                 | 530  | 0.23                         | 0.28    | 0.32    |
| PPC-E [Posterior Disease]          | 827  | 0.13                         | 0.16    | 0.21    |
| PPC-F [Severe tooth Loss]          | 474  | 0.14                         | 0.17    | 0.20    |
| PPC-G [Severe Disease]             | 237  | 0.24                         | 0.30    | 0.34    |

\*Logistic regression model including terms for examination center, gender, age, diabetes, smoking (5 levels) and ancestry (10 PCs). In adjusted logistic models all strata demonstrated a greater positive predictive value for 10-year tooth loss with the carriage of the minor allelic variant, irrespective of periodontal status. Statistical significance was achieved for most comparisons with a clear allelic dose-response effect across all periodontal categories, including health.



**Supplementary Table 5. Odds ratios and 95% confidence intervals for prevalent Stroke stratified on IL-37v1 genotype in the Dental ARIC sample (prevalence=1.6%, sample n=4464).**

| Odds Ratio Prevalent Stroke (95% CI) | rs3811046 WT-1.1(TT) | rs3811046 V1-1.1+1.2(TG + GG) |
|--------------------------------------|----------------------|-------------------------------|
| Overall                              | Ref                  | 2.08 (1.25-3.46)              |
| PPC-A [Health]                       | Ref                  | 4.72 (1.32-16.8)              |
| PPC-B [Mild disease]                 | 1.55 (0.31-7.86)     | 6.13 (1.67-22.4)              |
| PPC-C [High Gingival Index]          | 2.50 (0.25-25.6)     | --                            |
| PPC-D [Tooth Loss]                   | 2.58 (0.55-12.1)     | 1.66 (0.32-8.59)              |
| PPC-E [Posterior Disease]            | 1.19 (0.23-6.08)     | 2.88 (0.72-11.6)              |
| PPC-F [Severe tooth Loss]            | 4.70 (1.11-19.9)     | 5.79 (1.46-23.0)              |
| PPC-G [Severe Disease]               | 5.66 (1.08-30.8)     | 8.53 (1.92-38.0)              |

Rs3811046 genotype: WT 1.1 TT vs V1 1.2+2.2 TG + GG. Adjusted for Gender, Age, Examination Center, Diabetes, Hypertension, Smoking (5-levels), HDL, Cholesterol, BMI and 10 Ancestry PCs. The change in BIC (Bayesian Information Coefficient) is 9.08 reflecting a “strong” improvement in the logistic model by the addition of the SNP.
