# Supplementary material for: GWAS for Interleukin-1β levels in gingival crevicular fluid identifies IL37 variants in periodontal inflammation
Source: PubMed Central journal article supplement (PMC6134146; doi:10.1038/s41467-018-05940-9), 2018-09-11
Supplement: 41467_2018_5940_MOESM3_ESM.pdf [file 41467_2018_5940_MOESM3_ESM.pdf]

## **Description of Supplementary Data files**

### *Supplementary Data 1*

GWAS results for GCF-IL-1beta upper quartile vs lower three quartiles
